# Supplementary material for: The effect of the LiCoO2/Li7La3Zr2O12 ratio on the structure and electrochemical properties of nanocomposite cathodes for all-solid-state lithium batteries
Source: Royal Society of Chemistry journal article supplement (doi:10.1039/c7ta05527g), 2017-01-01
Supplement: c7ta05527g1.pdf [file c7ta05527g1.pdf]

**Effect of  $\text{LiCoO}_2/\text{Li}_7\text{La}_3\text{Zr}_2\text{O}_{12}$  ratio on the structure and electrochemical properties of nanocomposite cathodes for all-solid-state lithium batteries**

Hiroaki Wakayama<sup>†\*</sup> and Yasuaki Kawai<sup>†</sup>

<sup>†</sup>Toyota Central R&D Laboratories, Inc., Nagakute, Aichi 480-1192, Japan

\*Hiroaki Wakayama

Telephone: + 81-561-71-7861; fax: +81-561-63-6948

Postal address: Toyota Central R & D Laboratories, Inc., Nagakute, Aichi 480-1192, Japan

E-mail: wakayama@mosk.tytlabs.co.jp

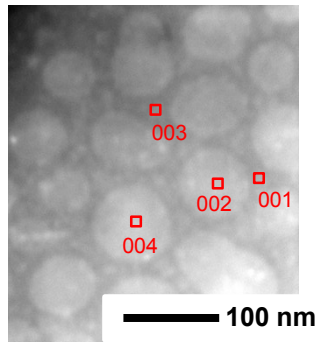

**Figure S1.** STEM image of a spin-casted sample with an LCO content ratio of 0.9.

**Table S1.** EDX spectroscopy results for the spots labeled in Figure S1.

| Spot | Co   | Zr   | La   | C     |
|------|------|------|------|-------|
| 001  | 0.01 | 0.25 | 0.11 | 99.63 |
| 002  | 1.27 | 0.00 | 0.01 | 98.72 |
| 003  | 0.00 | 0.22 | 0.09 | 99.69 |
| 004  | 1.34 | 0.01 | 0.00 | 98.65 |

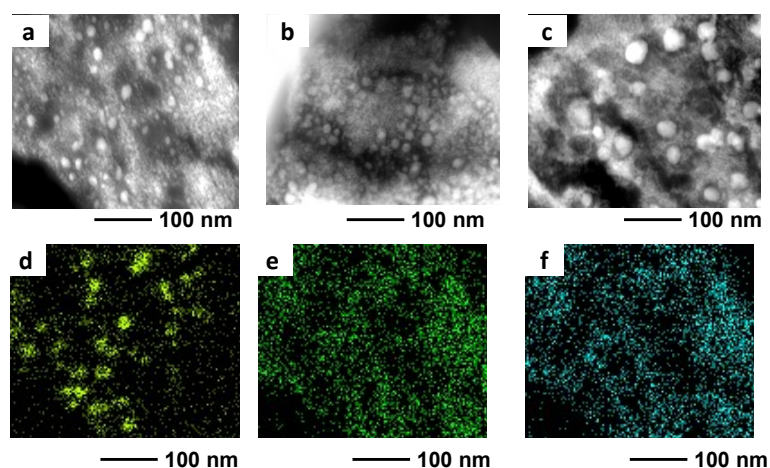

**Figure S2.** STEM images of calcined (723 K) LCO/LLZ nanocomposite samples with LCO content ratios of 0.9 (a), 0.8 (b), and 0.7 (c) and EDX mapping images for Co (d), Zr (e), and La (f) in a calcined (723 K) sample with an LCO content ratio of 0.9.

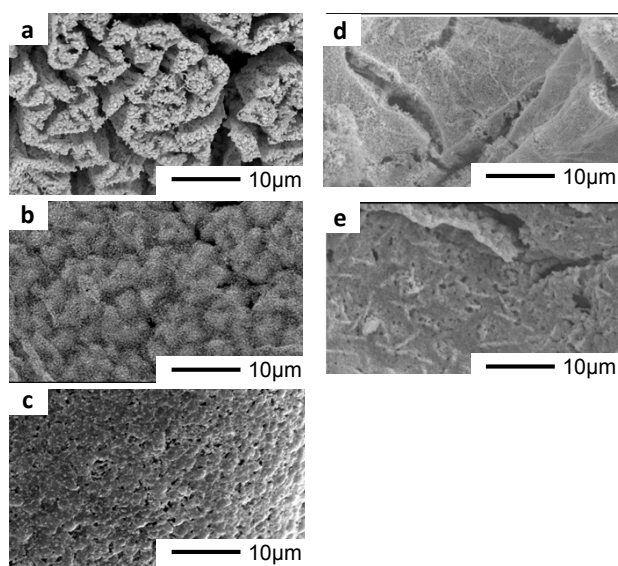

**Figure S3.** Scanning electron microscopy images of samples that were calcined at 1023 K and had LCO content ratios of 0.7 (a), 0.8 (b), 0.9 (c), 0.95 (d) and 0.975 (e).
